# Supplementary material for: Rutin-Loaded Nanovesicles for Improved Stability and Enhanced Topical Efficacy of Natural Compound
Source: MDPI journal article supplement (doi:10.3390/jfb12040074), 2021-12-13
Supplement: s1 [file s1]

# Rutin-Loaded Nanovesicles for Improved Stability and Enhanced Topical Efficacy of Natural Compound

Maria Chiara Cristiano <sup>1</sup>, Antonella Barone <sup>1</sup>, Antonia Mancuso <sup>2</sup>, Daniele Torella <sup>1</sup>  
and Donatella Paolino<sup>1,\*</sup>

<sup>1</sup> Department of Experimental and Clinical Medicine, University "Magna Graecia" of Catanzaro, 88100 Catanzaro, Italy; mchiara.cristiano@unicz.it (M.C.C.); barone@unicz.it (A.B.); dtorella@unicz.it (D.T.)

<sup>2</sup> Department of Health Sciences, University of Catanzaro "Magna Graecia", 88100 Catanzaro, Italy; antonia.mancuso@unicz.it (A.M.)

\* Correspondence: paolino@unicz.it; Tel.: +39-0961-369-4211

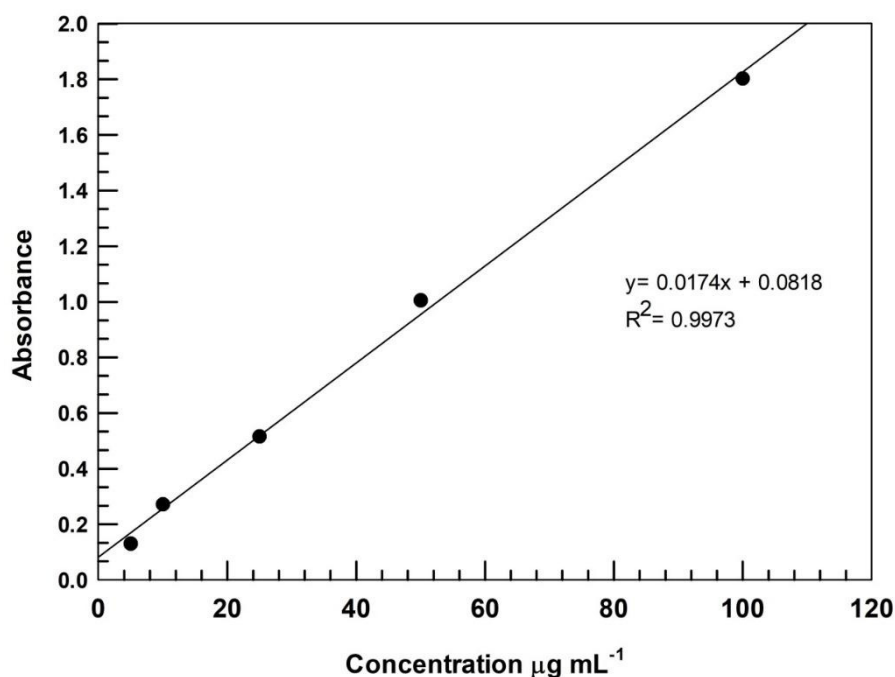

**Figure S1.** Rutin external calibration curve obtained using a UV-Vis spectrophotometer (Perkin Elmer Lambda 35, Waltham, Massachusetts, USA). The figure reports representative data from three independent experiments.

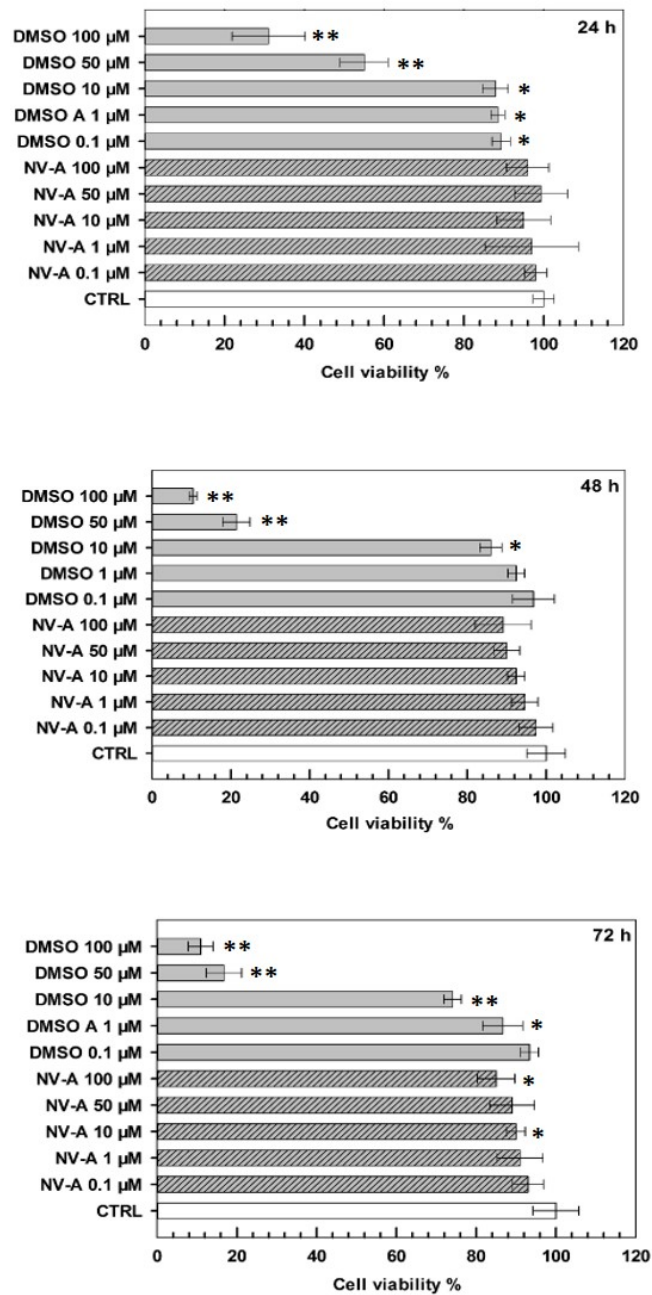

**Figure S2.** Cytotoxic effects of NV-A and DMSO, used for solubilizing rutin in the other in vitro experiments, of which the concentrations referred to NV-A<sub>4</sub> and the free rutin solution concentrations used at 24 h, 48 h, and 72 h. The results are expressed as mean value of three independent experiments  $\pm$  standard deviation.
